# Supplementary material
Source: Springer Nature journal article supplement (https://www.springermedizin.de/resource/supplementary/12885_2011_3194_MOESM10_ESM.pdf/9462996)

# HT29 cells

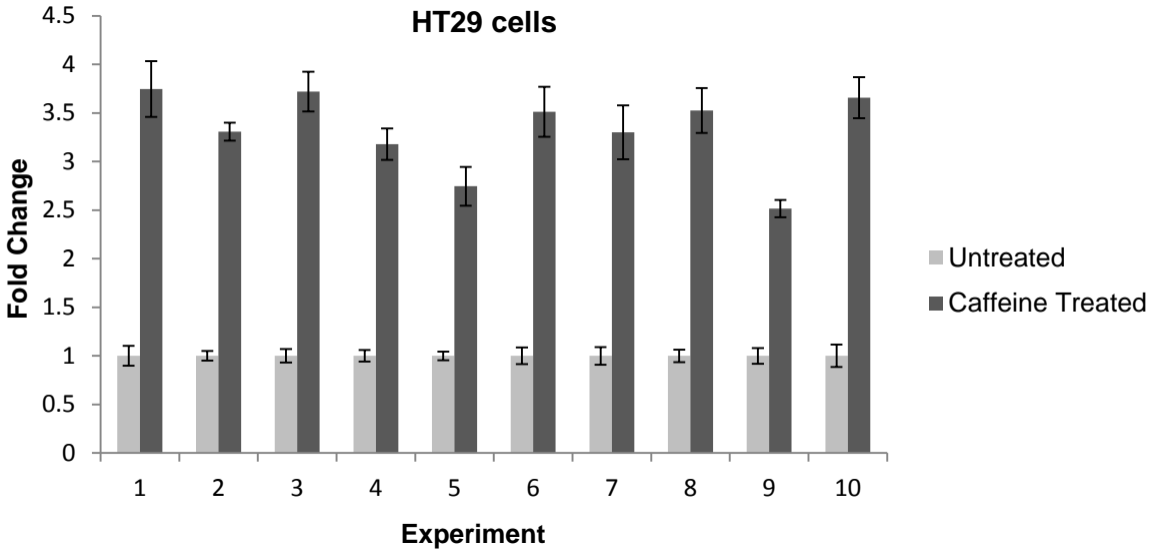

Supplement: MOESM10 [file 9462996]
